# Supplementary material for: Visible light induced wetting of nanostructured N-F co-doped titania films
Source: Royal Society of Chemistry journal article supplement (doi:10.1039/c0pp00159g), 2010-08-26
Supplement: c0pp00159g.pdf [file c0pp00159g.pdf]

Electronic supplementary information (ESI)

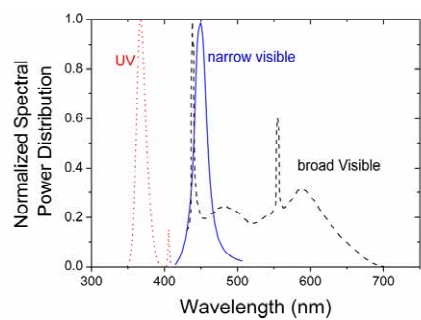

Fig. S1. Emission spectra of the three light sources used in this work, as obtained by their market datasheets. a) UV black-light blue lamps, b) visible fluorescent lamps with 430 cut-off filter and c) royal blue LEDs.
